# Supplementary material for: Photoassisted oxygenation of alkane catalyzed by ruthenium complexes using 2,6-dichloropyridine N-oxide under visible light irradiationElectronic supplementary information (ESI) available: syntheses of the complexes, crystallographic data of complex 4 (Table S-1), 1H NMR spectra before and after irradiation (Fig. S-1, S-2, S-3, S-5), UV-vis spectral change (Fig. S-4, S-6). See http://www.rsc.org/suppdata/cc/b3/b316970g/
Source: Royal Society of Chemistry journal article supplement (doi:10.1039/b316970g), 2004-01-01
Supplement: b316970g.pdf [file b316970g.pdf]

Supporting Information:

**cis(Cl, N<sub>amino</sub>)-[RuCl(TPA)(Me<sub>2</sub>SO)]Cl (5) and trans(Cl, N<sub>amino</sub>)-[RuCl(TPA)(Me<sub>2</sub>SO)]Cl (1).**

A solution of TPA (0.41 g, 1.4 mmol) and cis-[RuCl<sub>2</sub>(Me<sub>2</sub>SO)<sub>4</sub>] (0.68 g, 1.4 mmol) in 80 mL of methanol was refluxed for 2 h. The reaction mixture was concentrated to dryness, and resulting solid was dissolved in a small amount of methanol. After adding ethyl acetate, the solution was kept in a refrigerator overnight. Yellow precipitates were collected and dried in vacuo. The crude complex was a mixture of an approximately equal amount of the trans and cis isomers, which was isolated by fractional recrystallization from methanol and ethyl acetate. The cis isomer (**5**) and the trans isomer (**1**) were obtained as yellow powder and pale orange powder, respectively. The complex **5** was less soluble. Yield 0.24 g (32 %) for **5** and 0.39 g (52 %) for **1**. *Anal.* For **5**: Found: C, 43.01; H, 4.69; N, 10.03. Calcd for C<sub>20</sub>H<sub>24</sub>Cl<sub>2</sub>N<sub>4</sub>ORuS H<sub>2</sub>O: C, 42.72; H, 4.80; N, 9.76. For **1**: Found: C, 43.01; H, 4.69; N, 10.03. Calcd for C<sub>20</sub>H<sub>24</sub>Cl<sub>2</sub>N<sub>4</sub>ORuS H<sub>2</sub>O: C, 42.72; H, 4.80; N, 9.76. FAB-MS: (M-Cl)<sup>+</sup> 505 for **1** and **5**. <sup>1</sup>H NMR: δ(CD<sub>3</sub>CN, 270MHz) For **5**: 3.42 (6H, s, CH<sub>3</sub>), 4.69 (2H, s, CH<sub>2</sub>(ax)), 4.79 (2H, d, J=15 Hz, CH<sub>2</sub>(eq)), 5.76 (2H, d, J=15, CH<sub>2</sub>(eq)), 6.95 (1H, d, J=7.9, py-H3(ax)), 7.16-7.25 (3H, m, py-H5(ax + eq)), 7.46-7.51 (3H, m, py-H4(ax) + py-H3(eq)), 7.73 (2H, t, J=7.8, py-H4(eq)), 8.70 (2H, d, J=5.6, py-H6(eq)), 9.81 (1H, d, J=5.6, py-H6(ax)). For **1**: 2.84 (6H, s, CH<sub>3</sub>), 4.53 (2H, s, CH<sub>2</sub>(ax)), 4.72 (2H, d, J=15 Hz, CH<sub>2</sub>(eq)), 5.39 (2H, d, J=15, CH<sub>2</sub>(eq)), 7.13 (1H, d, J=7.9, py-H3(ax)), 7.26-7.36 (3H, m, py-H5(ax + eq)), 7.43 (2H, d, J=7.9, py-H3(eq)), 7.64 (1H, t, J=7.9, py-H4(ax)), 7.76 (2H, t, J=7.8, py-H4(eq)), 8.75 (2H, d, J=5.3, py-H6(eq)), 9.69 (1H, d, J=5.6, py-H6(ax)). The pyridyl protons having small J values of about 5.5 Hz were easily assigned as H6 and other protons were determined from it. The assignment of the pyridyl groups was confirmed by COSY measurements.

**trans(Cl, N<sub>amino</sub>)-[RuCl{5-(MeOCO)<sub>3</sub>-TPA}(Me<sub>2</sub>SO)]Cl (2)** The complex **2** was obtained in the procedure similar to the complex **1** using 5-(MeOCO)<sub>3</sub>-TPA and cis-[RuCl<sub>2</sub>(Me<sub>2</sub>SO)<sub>4</sub>] except that the resulting product was recrystallized from methanol-ethyl acetate and orange crystals obtained were the trans(Cl, N<sub>amino</sub>) isomer. Yield 88%. FAB-MS: (M- Cl)<sup>+</sup> 679, (M- Cl -Me<sub>2</sub>SO)<sup>+</sup> 601. <sup>1</sup>H NMR: δ(CDCl<sub>3</sub>, 270MHz) 2.93 (6H, s, Me<sub>2</sub>SO), 3.95 (6H, s, CH<sub>3</sub>OCO), 3.98 (3H, s, CH<sub>3</sub>OCO), 5.38 (2H, s, CH<sub>2</sub>(ax)), 5.42 (2H, d, J=15.5Hz, CH<sub>2</sub>(eq)), 5.81 (2H, d, J=15.5Hz, CH<sub>2</sub>(eq)), 7.64 (1H, d, J=8.2Hz, py-H3(ax)), 7.82 (2H, J=8.2Hz, py-H3(eq)), 8.17 (1H, dd, J=2.0, 8.2Hz, py-H4(ax)), 8.29 (2H, dd, J=2.0, 8.2Hz, py-H4(eq)), 9.33 (2H, d, J=2.0Hz, py-H6(eq)), 10.29 (1H, d, J=2.0Hz, py-H6(ax)).

The complex **2** is assumed to be trans isomer, since the chemical shift of DMSO methyl groups is similar to that of trans(Cl, N<sub>amino</sub>)-[RuCl(TPA)(Me<sub>2</sub>SO)]Cl (**1**). The structure of trans(Cl,

$N_{\text{amino}}\text{-[RuCl(TPA)(Me}_2\text{SO)] [RuCl}_3\text{(Me}_2\text{SO)}_3\text{]} \mathbf{3}$  and  $\text{cis(Cl, } N_{\text{amino}}\text{-[RuCl(TPA)(Me}_2\text{SO)]Cl} \mathbf{(5)}$  has been confirmed by X-ray structure analysis.<sup>6a,6e</sup>

**trans(Cl,  $N_{\text{amino}}\text{-[RuCl{5-(MeOCO)}_3\text{-TPA}]\text{(Me}_2\text{SO)]PF}_6 \mathbf{(4)}$**  The complex **4** was obtained by adding ammonium hexafluorophosphate to a solution of complex **2** in water. Yield 98%. FAB-MS:  $(M\text{-PF}_6)^+$  679,  $(M\text{-PF}_6\text{-Me}_2\text{SO})^+$  601.  $^1\text{H NMR: } \delta(\text{CD}_3\text{CN, 270MHz})$  2.86 (6H, s,  $\text{Me}_2\text{SO}$ ), 3.89 (6H, s,  $\text{CH}_3\text{OCO}$ ), 3.93 (3H, s,  $\text{CH}_3\text{OCO}$ ), 4.59 (2H, s,  $\text{CH}_2(\text{ax})$ ), 4.87 (2H, d,  $J=15.5\text{Hz}$ ,  $\text{CH}_2(\text{eq})$ ), 5.39 (2H, d,  $J=15.5\text{Hz}$ ,  $\text{CH}_2(\text{eq})$ ), 7.24 (1H, d,  $J=8.2\text{Hz}$ ,  $\text{py-H3(ax)}$ ), 7.57 (2H,  $J=8.2\text{Hz}$ ,  $\text{py-H3(eq)}$ ), 8.16 (1H, dd,  $J=2.0, 8.2\text{Hz}$ ,  $\text{py-H4(ax)}$ ), 8.27 (2H, dd,  $J=2.0, 8.2\text{Hz}$ ,  $\text{py-H4(eq)}$ ), 9.20 (2H, d,  $J=2.0\text{Hz}$ ,  $\text{py-H6(eq)}$ ), 10.22 (1H, d,  $J=2.0\text{Hz}$ ,  $\text{py-H6(ax)}$ ).

**Table S-1.** Crystallographic Data for  $\text{trans(Cl, } N_{\text{amino}}\text{-[RuCl{5-(MeOCO)}_3\text{-TPA}]\text{(Me}_2\text{SO)]PF}_6 \mathbf{(4)}$ .

---

**4**

---

|                                             |                                                                               |
|---------------------------------------------|-------------------------------------------------------------------------------|
| empirical formula                           | $\text{C}_{26}\text{H}_{30.4}\text{ClF}_6\text{N}_4\text{O}_{7.2}\text{PRuS}$ |
| fw                                          | 827.69                                                                        |
| crystal system                              | triclinic                                                                     |
| a, Å                                        | 11.5045 (9)                                                                   |
| b, Å                                        | 14.2950 (11)                                                                  |
| c, Å                                        | 11.4761 (8)                                                                   |
| $\alpha$ , deg                              | 104.455 (3)                                                                   |
| $\beta$ , deg                               | 106.799 (3)                                                                   |
| $\gamma$ , deg                              | 97.201 (2)                                                                    |
| V, Å <sup>3</sup>                           | 1709.4 (2)                                                                    |
| space group                                 | P-1                                                                           |
| Z                                           | 2                                                                             |
| $D_{\text{calc}}$ , g cm <sup>-3</sup>      | 1.608                                                                         |
| Temperature, K                              | 293                                                                           |
| $\mu(\text{Mo K}\alpha)$ , cm <sup>-1</sup> | 7.25                                                                          |
| no. of reflections used                     | 7097                                                                          |
| no. of variables                            | 506                                                                           |
| R                                           | 0.033                                                                         |
| $R_w$                                       | 0.092                                                                         |
| goodness of fit                             | 1.18                                                                          |

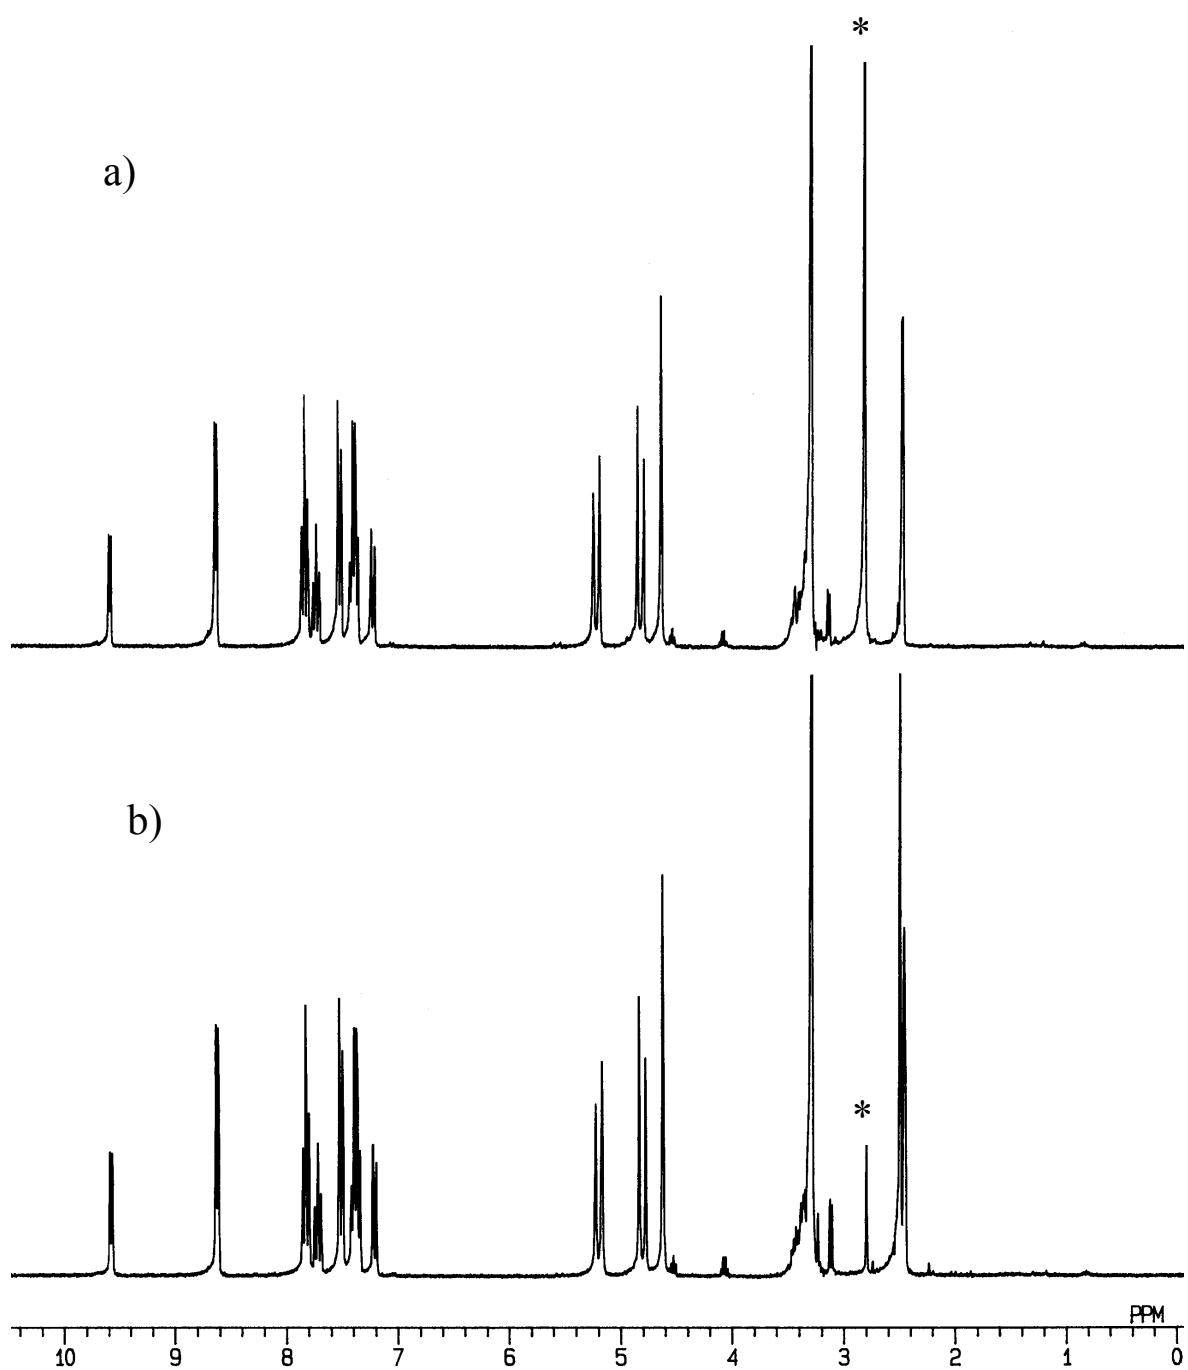

**Figure S-1.**  $^1\text{H}$  NMR spectra of  $\text{trans}(\text{Cl}, \text{N}_{\text{amino}})\text{-}[\text{RuCl}(\text{TPA})(\text{DMSO})]\text{Cl}$  (**1**) in  $\text{Me}_2\text{SO-d}_6$ . Concentration: ca.  $1.0 \times 10^{-3}$  mol/l. a) Before irradiation.  $\delta(\text{Me}_2\text{SO-d}_6, 270\text{MHz})$  2.81 (6H, s,  $\text{CH}_3$ ), 4.66 (2H, s,  $\text{CH}_2(\text{ax})$ ), 4.83 (2H, d,  $J=15$  Hz,  $\text{CH}_2(\text{eq})$ ), 5.26 (2H, d,  $J=15$ ,  $\text{CH}_2(\text{ax})$ ), 7.25 (1H, d,  $J=7.9$ , py-H3(ax)), 7.40-7.45 (3H, m, py-H5(ax + eq)), 7.55 (2H, d,  $J=7.9$ , py-H3(eq)), 7.77 (1H, t,  $J=7.9$ , py-H4(ax)), 7.88 (2H, t,  $J=7.8$ , py-H4(eq)), 8.67 (2H, d,  $J=5.3$ , py-H6(eq)), 9.62 (1H, d,  $J=5.6$ , py-H6(ax)). b) After 600-min irradiation. The peak of DMSO(\*) at 2.81 ppm collapsed.

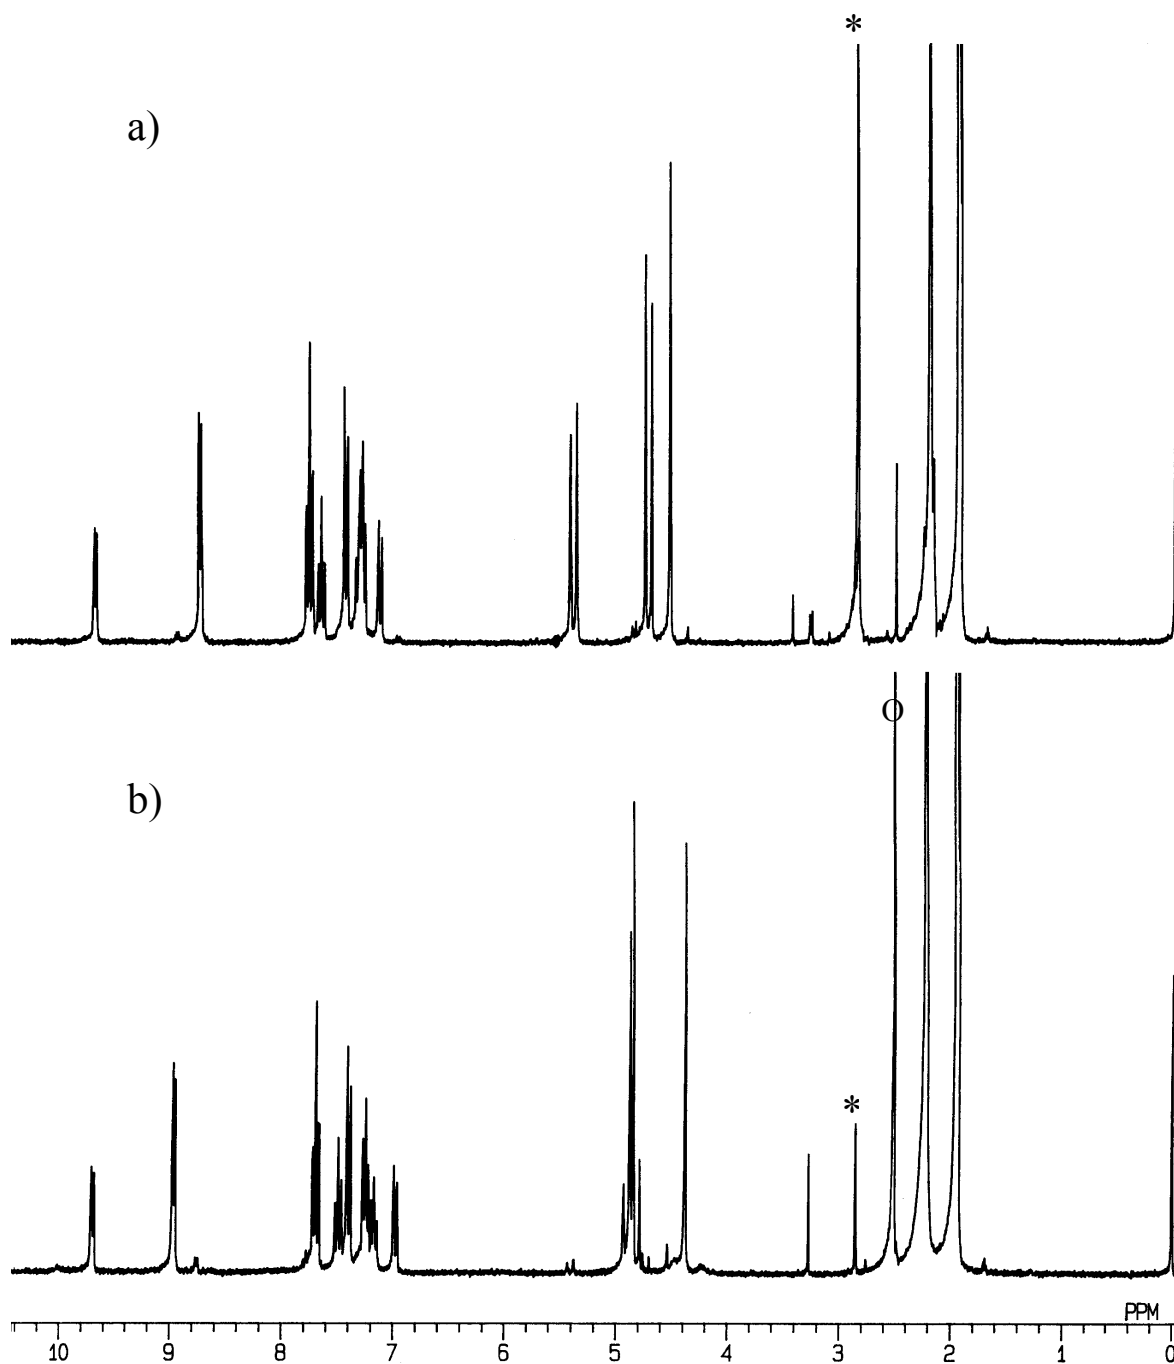

**Figure S-2.**  $^1\text{H}$  NMR spectra of  $\text{trans}(\text{Cl}, \text{N}_{\text{amino}})\text{-}[\text{RuCl}(\text{TPA})(\text{DMSO})]\text{Cl}$  (**1**) in  $\text{MeCN-d}_3$ . Concentration: ca.  $1.0 \times 10^{-3}$  mol/l. a) Before irradiation.  $^1\text{H}$  NMR:  $\delta(\text{CD}_3\text{CN}, 270\text{MHz})$  2.85 (6H, s,  $\text{CH}_3$ ), 4.49 (2H, s,  $\text{CH}_2(\text{ax})$ ), 4.67 (2H, d,  $J=15$  Hz,  $\text{CH}_2(\text{eq})$ ), 5.41 (2H, d,  $J=15$ ,  $\text{CH}_2(\text{ax})$ ), 7.12 (1H, d,  $J=7.9$ , py-H3(ax)), 7.27-7.32 (3H, m, py-H5(ax + eq)), 7.43 (2H, d,  $J=7.9$ , py-H3(eq)), 7.63 (1H, t,  $J=7.9$ , py-H4(ax)), 7.77 (2H, t,  $J=7.8$ , py-H4(eq)), 8.76 (2H, d,  $J=5.3$ , py-H6(eq)), 9.70 (1H, d,  $J=5.6$ , py-H6(ax)). b) After 150-min irradiation. The peak of DMSO(\*) at 2.85 ppm collapsed, and a free DMSO(O) appeared at 2.55 ppm.

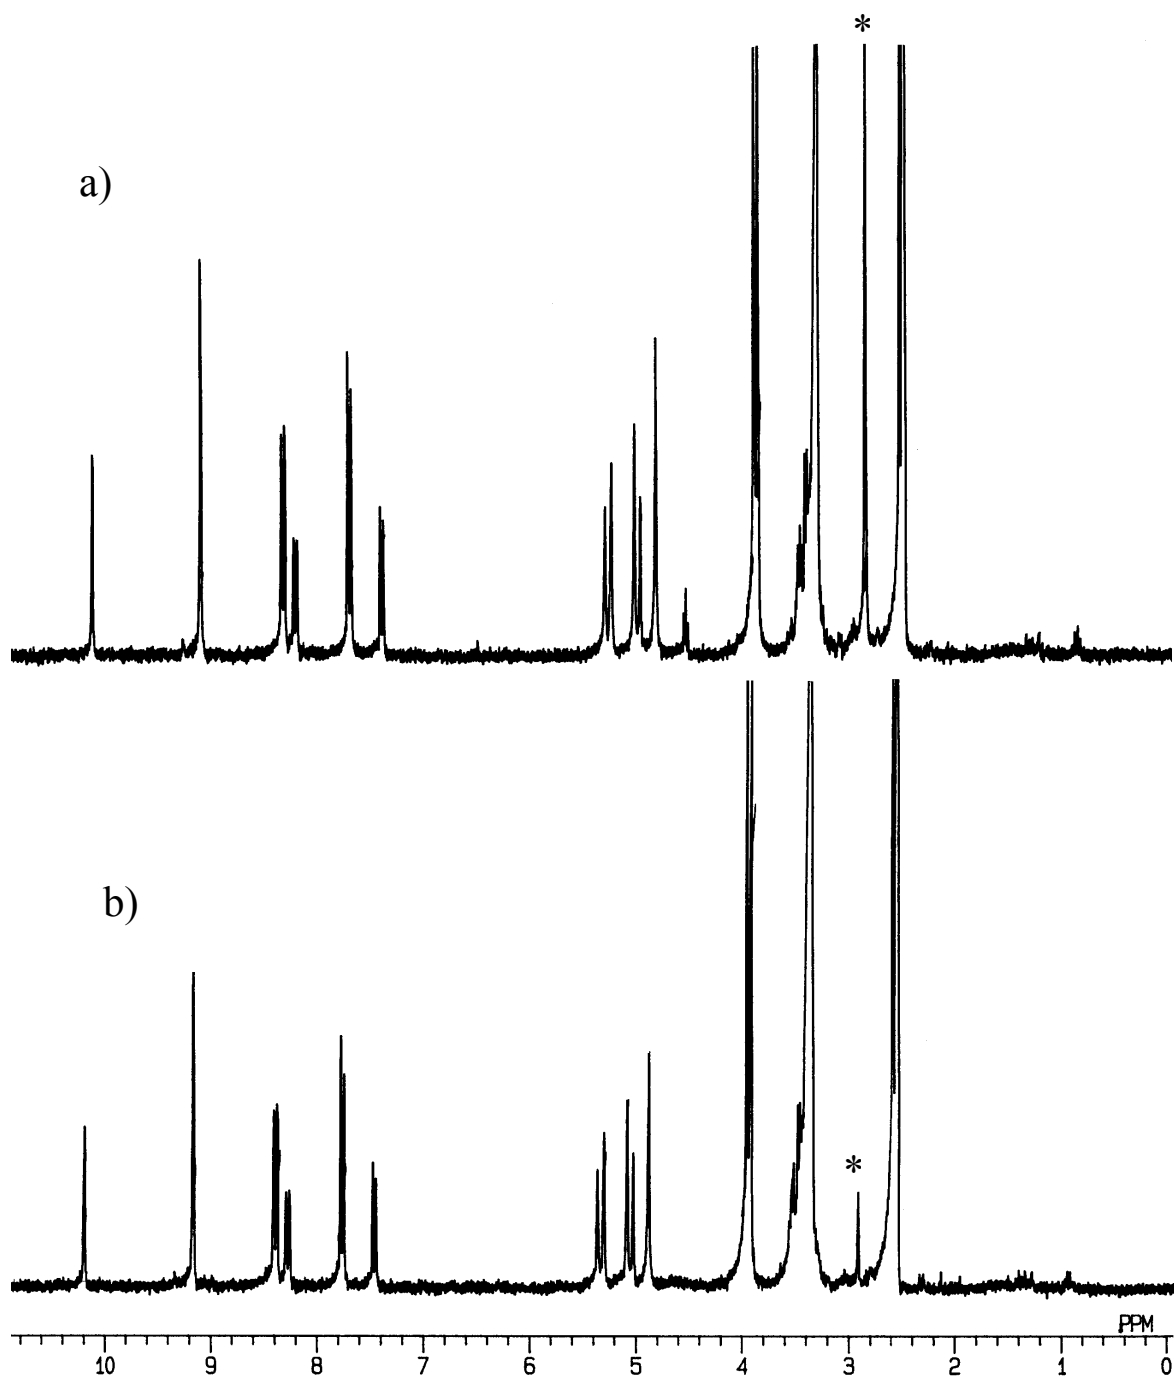

**Figure S-3.**  $^1\text{H}$  NMR spectra of  $\text{trans}(\text{Cl}, \text{Namino})\text{-}[\text{RuCl}\{5\text{-(MeOCO)}_3\text{-TPA}\}(\text{DMSO})]\text{Cl}$  (**2**) in  $\text{Me}_2\text{SO-d}_6$ . Concentration: ca.  $1.0 \times 10^{-3}$  mol/l. a) Before irradiation.  $^1\text{H}$  NMR:  $\delta(\text{Me}_2\text{SO-d}_6, 270\text{MHz})$  2.90 (6H, s,  $(\text{CH}_3)_2\text{SO}$ ), 3.92 (6H, s,  $\text{CH}_3\text{OCO}$ ), 3.95 (3H, s,  $\text{CH}_3\text{OCO}$ ), 4.88 (2H, s,  $\text{CH}_2(\text{ax})$ ), 5.04 (2H, d,  $J=15.5\text{Hz}$ ,  $\text{CH}_2(\text{eq})$ ), 5.32 (2H, d,  $J=15.5\text{Hz}$ ,  $\text{CH}_2(\text{eq})$ ), 7.43 (1H, d,  $J=8.2\text{Hz}$ , py-H3(ax)), 7.76 (2H, d,  $J=8.2\text{Hz}$ , py-H3(eq)), 8.26 (1H, dd,  $J=2.0, 8.2\text{Hz}$ , py-H4(ax)), 8.40 (2H, dd,  $J=2.0, 8.2\text{Hz}$ , py-H4(eq)), 9.18 (2H, d,  $J=2.0\text{Hz}$ , py-H6(eq)), 10.20 (1H, d,  $J=2.0\text{Hz}$ , py-H6(ax)). b) After 110-min irradiation. The peak of DMSO(\*) at 2.90 ppm collapsed.

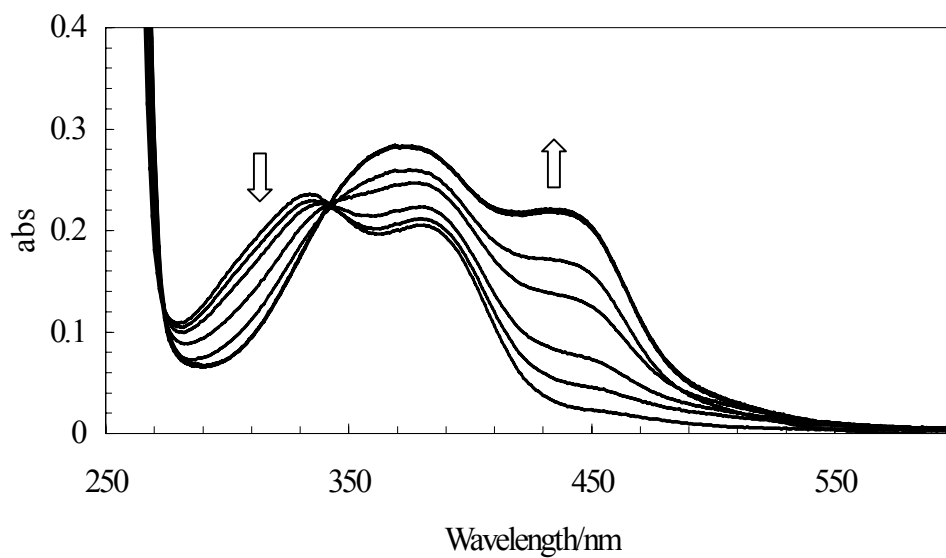

**Figure S-4.** UV-vis spectral change of  $\text{trans}(\text{Cl}, \text{N}_{\text{amino}})\text{-}[\text{RuCl}\{5\text{-}(\text{MeOCO})_3\text{-TPA}\}(\text{Me}_2\text{SO})]\text{Cl}$  (**2**), under photoirradiation in MeCN. Isosbestic points at 274 nm and 340 nm.  $\lambda_{\text{max}}$  (before irradiation): 334 nm; 379 nm.  $\lambda_{\text{max}}$  (after irradiation): 368 nm; 433 nm.  $3.95 \times 10^{-5}$  mol/l. 0, 3, 15, 30 sec, 1, 1.5, 2 min.

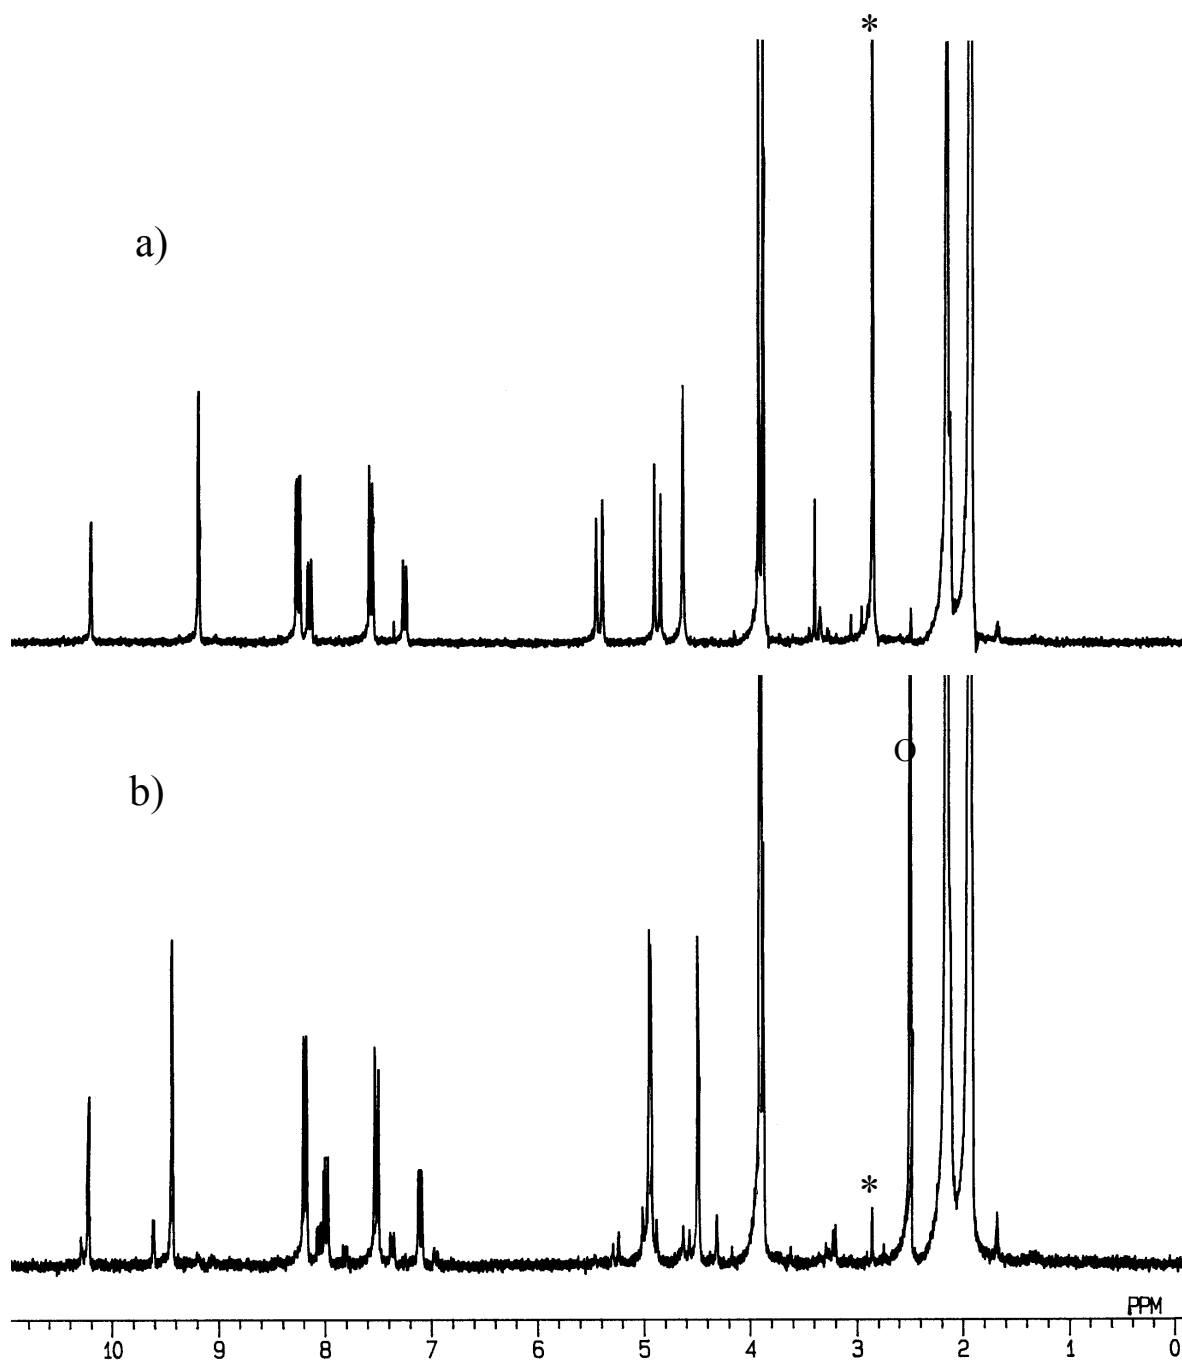

**Figure S-5.**  $^1\text{H}$  NMR spectra of  $\text{trans}(\text{Cl}, \text{Namino})\text{-}[\text{RuCl}\{5\text{-(MeOCO)}_3\text{-TPA}\}(\text{DMSO})]\text{Cl}$  (**2**) in  $\text{MeCN-d}_3$ . a) Before irradiation.  $^1\text{H}$  NMR:  $\delta(\text{CD}_3\text{CN}, 270\text{MHz})$  2.86 (6H, s,  $(\text{CH}_3)_2\text{SO}$ ), 3.89 (6H, s,  $\text{CH}_3\text{OCO}$ ), 3.93 (3H, s,  $\text{CH}_3\text{OCO}$ ), 4.59 (2H, s,  $\text{CH}_2(\text{ax})$ ), 4.82 (2H, d,  $J=15.5\text{Hz}$ ,  $\text{CH}_2(\text{eq})$ ), 5.44 (2H, d,  $J=15.5\text{Hz}$ ,  $\text{CH}_2(\text{eq})$ ), 7.24 (1H, d,  $J=8.2\text{Hz}$ ,  $\text{py-H3}(\text{ax})$ ), 7.57 (2H, d,  $J=8.2\text{Hz}$ ,  $\text{py-H3}(\text{eq})$ ), 8.16 (1H, dd,  $J=2.0, 8.2\text{Hz}$ ,  $\text{py-H4}(\text{ax})$ ), 8.27 (2H, dd,  $J=2.0, 8.2\text{Hz}$ ,  $\text{py-H4}(\text{eq})$ ), 9.20 (2H, d,  $J=2.0\text{Hz}$ ,  $\text{py-H6}(\text{eq})$ ), 10.22 (1H, d,  $J=2.0\text{Hz}$ ,  $\text{py-H6}(\text{ax})$ ). b) After 110-min irradiation. The peak of  $\text{DMSO}^*$  at 2.86 ppm collapsed, and a free  $\text{DMSO}(\text{O})$  appeared at 2.47 ppm.

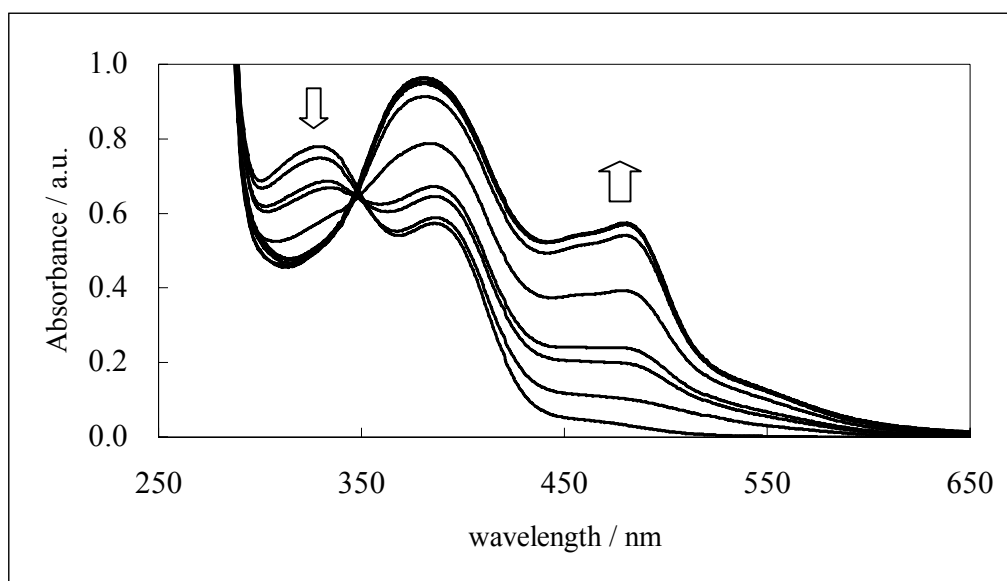

**Figure S-6.** UV-vis spectral change of  $\text{trans}(\text{Cl}, \text{N}_{\text{amino}})\text{-}[\text{RuCl}\{5\text{-}(\text{MeOCO})_3\text{-}(\text{TPA})\}(\text{Me}_2\text{SO})]\text{PF}_6$  (**4**), under photoirradiation in the presence of 4-picoline (10 equiv.) in 1,2-dichloroethane. Isosbestic points at 348 nm.  $\lambda_{\text{max}}$  (before irradiation): 332 nm; 383 nm.  $\lambda_{\text{max}}$  (after irradiation): 381 nm; 483 nm(sh).  $8.10 \times 10^{-5}$  mol/l. 0, 5, 15, 30sec, 1.5, 3, 5, 8 min.
